# Supplementary material for: Computational models in plant-pathogen interactions: the case of Phytophthora infestans
Source: PubMed Central journal article supplement (PMC2787490; doi:10.1186/1742-4682-6-24), 2009-11-12
Supplement: 1742-4682-6-24-S1.pdf [file 1742-4682-6-24-S1.pdf]

Additional file 1: Fundamental deterministic models used in plant pathology.

| Name                       | Model                                                                                                                                                   | Citation |
|----------------------------|---------------------------------------------------------------------------------------------------------------------------------------------------------|----------|
| Mono molecular model       | $\lambda(1-y_t)$                                                                                                                                        | [101]    |
| Gompertz model             | $\lambda y_t \ln \frac{1}{y_t}$                                                                                                                         | [102]    |
| Weibull model              | $\frac{\lambda}{\beta} \left( \frac{\tau - \alpha}{\beta} \right)^{\beta - 1} \exp \left[ - \left( \frac{\tau - \alpha}{\beta} \right)^{\beta} \right]$ | [103]    |
| Fundamental logistic model | $\lambda y_t (1 - y_t)$                                                                                                                                 | [104]    |
| Generalized model          | $R(y_{\tau-p} - y_{\tau-p-i})(1 - y_t)$                                                                                                                 | [105]    |

Vanderplank's model assumes that latent period ( $p$ ) has an effect on disease and that infected tissue duration ( $i$ ) is infinite. Generalized model includes  $P$ ,  $i$  and  $R$  as a corrected infection rate. In cases of such systemic infections or when a pathogen itself is transported by environmental factors, the corrected infection rate is assumed as in Vanderplank's original logistic model, since  $P$  can be assumed as 0 and  $i$  as infinite. Several logistic models have been derived from Vanderplank, generalized and monomolecular models, such Gompertz and Weibull models.
